## Retraction: CUL4B promotes bladder cancer metastasis and induces epithelial-to-mesenchymal transition by activating the Wnt/ $\beta$ -catenin signaling pathway

Xia-Wa Mao<sup>1</sup>, Jia-Quan Xiao<sup>1</sup>, Gang Xu<sup>1</sup>, Zhong-Yi Li<sup>1</sup>, Hui-Feng Wu<sup>1</sup>, Yi Li<sup>1</sup>, Yi-Chun Zheng<sup>1</sup> and Nan Zhang<sup>1</sup>

<sup>1</sup>Department of Urology, The Second Affiliated Hospital of Zhejiang University School of Medicine, Hangzhou 310009, P.R. China

**Published:** August 05, 2024

**Copyright:** © 2024 Mao et al. This is an open access article distributed under the terms of the [Creative Commons Attribution License](#) (CC BY 4.0), which permits unrestricted use, distribution, and reproduction in any medium, provided the original author and source are credited.

**This article has been retracted:** Instances of image duplication have been discovered in this paper. Specifically, the WIF-1 panel of Figure 7C contains an overlap with the SFRP1+miR-27a inhibitors image in Figure 7C of an earlier published paper [1]. Figure 2B also contains multiple western blot overlaps with Figure 2B of another earlier published paper [2]. Therefore, the Editorial decision has been made to retract this paper. All authors agreed with the decision.

Original article: Oncotarget. 2017; 8:77241–77253. <https://doi.org/10.18632/oncotarget.20455>

### REFERENCES

1. Kong LY, Xue M, Zhang QC, Su CF. *In vivo* and *in vitro* effects of microRNA-27a on proliferation, migration and invasion of breast cancer cells through targeting of SFRP1 gene via Wnt/ $\beta$ -catenin signaling pathway. Oncotarget. 2017; 8:15507–19. <https://doi.org/10.18632/oncotarget.14662>. [PubMed]
2. Hu JL, Hu XL, Guo AY, Wang CJ, Wen YY, Cang SD. Endoplasmic reticulum stress promotes autophagy and apoptosis and reverses chemoresistance in human ovarian cancer cells. Oncotarget. 2017; 8:49380–94. <https://doi.org/10.18632/oncotarget.17673>. [PubMed]
